# Supplementary material for: The Relationship between All-Cause Dementia and Acute Diabetes Complications among American Indian and Alaska Native Peoples
Source: MDPI journal article supplement (doi:10.3390/ijerph21040496), 2024-04-18
Supplement: s1 [file s1]

Supplemental Table S1a. ICD-9 Diagnoses Codes used to identify three acute diabetic complications

| Three acute diabetic complications | ICD-9 Diagnosis Code                                                                                                                                                                        |
|------------------------------------|---------------------------------------------------------------------------------------------------------------------------------------------------------------------------------------------|
| <i>Hypoglycemia</i>                | 251.0, 251.1, 251.2, 270.3, 775.0, 775.6, 962.3, 250.8 with excluding admissions with the secondary ICD-9 codes: 259.8, 272.7, 681.xx, 682.xx, 686.9x, 707.xx, 709.3, 730.0-730.2, or 731.8 |
| <i>Hyperglycemia</i>               | 250.02, 250.03, 250.1, 250.2, 250.3                                                                                                                                                         |
| <i>Ketoacidosis</i>                | 250.10, 250.11, 250.12, or 250.13                                                                                                                                                           |

Supplemental Table S1b. ICD-9 Diagnoses Codes used to identify dementia in the Medicare study

| Dementia subtype        | ICD-9 diagnosis code                                                                                                          |
|-------------------------|-------------------------------------------------------------------------------------------------------------------------------|
| Alzheimer's disease     | 331.0                                                                                                                         |
| Vascular                | 290.40, 290.41, 290.42, 290.43                                                                                                |
| Lewy Body*              | 331.82, 332.0 + 331.0*                                                                                                        |
| Frontotemporal          | 331.1, 331.11, 331.19                                                                                                         |
| Alcohol induced         | 291.2                                                                                                                         |
| Other†                  | 046.11, 046.19, 292.82, 333.4                                                                                                 |
| Not otherwise specified | 290.0, 290.10, 290.11, 290.12, 290.13, 290.20, 290.21, 290.3, 290.9, 294.1, 294.10, 294.11, 294.20, 294.21, 294.8, 331.2, 797 |

\* Diagnosis code 332.0 had to have a diagnosis code of 331.0 on the same claim to be considered Lewy Body.

† Other dementia includes Creutzfeldt-Jakob disease, Huntington's chorea, and drug-induced dementia.

Source: Goodman RA, Lochner KA, Thambisetty M, Wingo TS, Posner SF, Ling SM. Prevalence of dementia subtypes in United States Medicare fee-for-service beneficiaries, 2011–2013. *Alzheimer's Dement.* 2017; 13(1):28-37.

Supplemental Table S2. Association between # of each acute diabetic complication and dementia status in fiscal year 2013 (n=29,337)

|                | <b>Hypoglycemia<br/>(total # of events=1,901)</b> |         | <b>Hyperglycemia<br/>(total # of events=1,989)</b> |         | <b>Diabetic Ketoacidosis<br/>(total # of events=377)</b> |         | <b>Any Complication<br/>(total # of events=4,276)</b> |         |
|----------------|---------------------------------------------------|---------|----------------------------------------------------|---------|----------------------------------------------------------|---------|-------------------------------------------------------|---------|
|                | IRR (95% CI)                                      | P-value | IRR (95% CI)                                       | P-value | IRR (95% CI)                                             | P-value | IRR (95% CI)                                          | P-value |
| <b>Model 0</b> | 4.21 (3.22, 5.50)                                 | <.0001  | 1.46 (1.08, 1.98)                                  | 0.0139  | 1.09 (0.63, 1.90)                                        | 0.7581  | 2.56 (2.03, 3.22)                                     | <.0001  |
| <b>Model 1</b> | 3.32 (2.52, 4.37)                                 | <.0001  | 2.46 (1.80, 3.36)                                  | <.0001  | 2.94 (1.30, 6.66)                                        | 0.0098  | 3.04 (2.39, 3.85)                                     | <.0001  |
| <b>Model 2</b> | 2.57 (1.99, 3.33)                                 | <.0001  | 2.06 (1.51, 2.81)                                  | <.0001  | 2.43 (1.09, 5.42)                                        | 0.0300  | 2.51 (1.99, 3.16)                                     | <.0001  |
| <b>Model 3</b> | 1.94 (1.50, 2.51)                                 | <.0001  | 1.52 (1.11, 2.08)                                  | 0.0094  | 1.82 (0.83, 4.01)                                        | 0.1345  | 1.92 (1.53, 2.41)                                     | <.0001  |
| <b>Model 4</b> | 1.96 (1.52, 2.54)                                 | <.0001  | 1.63 (1.19, 2.23)                                  | 0.0023  | 2.00 (0.92, 4.36)                                        | 0.0799  | 2.02 (1.61, 2.53)                                     | <.0001  |
| <b>Model 5</b> | 1.94 (1.51, 2.50)                                 | <.0001  | 1.63 (1.20, 2.21)                                  | 0.0018  | 1.88 (0.88, 4.01)                                        | 0.1013  | 2.00 (1.61, 2.48)                                     | <.0001  |

Models: 0=Unadjusted, dementia status only; 1=Model 0 + Demographics; 2=Model 1 + Insurance and IHS sites; 3= Model 2 + Comorbidity index (including CVD, Cancer, Hypertension, Liver disease, Mental disease, Depression, Alcohol and drug use disorder, and Tobacco use disorder); 4= Model 3 + Clinical measurement (i.e., LDL, A1C, and SBP); 5= Model 4 + Treatment (i.e., CVD medication, Diabetes medication type, Hypertension medication)  
IRR, Incidence Rate Ratio (i.e., Relative Risk).



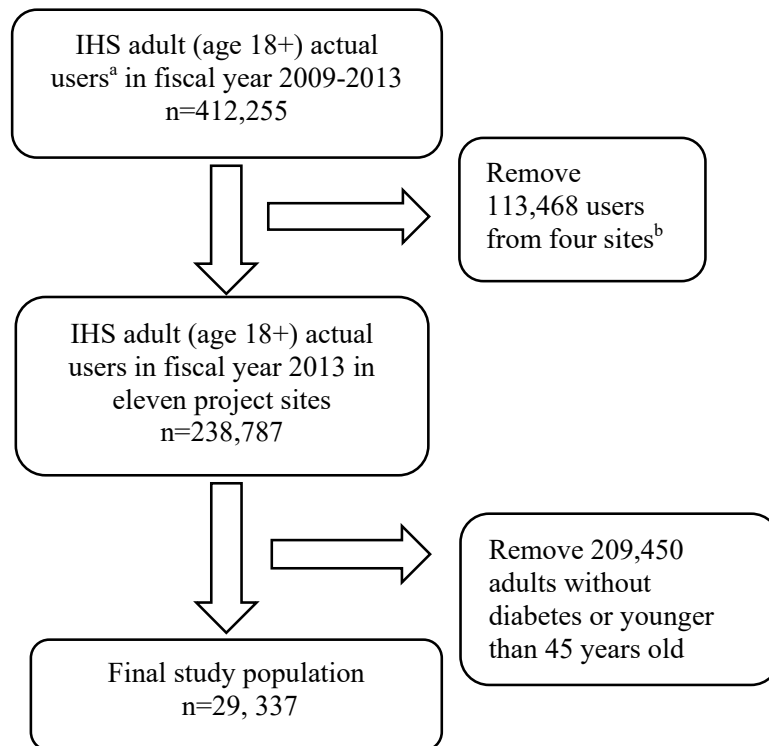

**Supplemental Figure S1.** Flowchart of inclusion and exclusion of the study population.

<sup>a</sup> Indian Health Service (IHS) actual users in a fiscal year (FY) refer to those who used IHS services at least once with a diagnostic code in that FY.

<sup>b</sup> Data from 4 of the 15 project sites were excluded because 2 sites did not provide I/T hospital inpatient and emergency services, 1 site had incomplete purchased/referred care (PRC) hospital data, and another site was not part of the IHS data project until FY2011.
